# Supplementary material for: Solution combustion synthesis of Ni/La2O3 for dry reforming of methane: tuning the basicity via alkali and alkaline earth metal oxide promoters
Source: Royal Society of Chemistry journal article supplement (doi:10.1039/d1ra05511a), 2021-01-01
Supplement: d1ra05511a1.pdf [file d1ra05511a1.pdf]

## Solution Combustion Synthesis of Ni/La<sub>2</sub>O<sub>3</sub> Catalysts Promoted with Alkali and Alkaline Earth Metal Oxides for Dry Reforming of Methane

Yahia H. Ahmad,<sup>a</sup> Assem T. Mohamed,<sup>a</sup> Anand Kumar,<sup>b</sup> and Siham Y. Al-Qaradawi<sup>\*,a</sup>

a. Department of Chemistry and Earth Sciences, College of Arts and Sciences, Qatar University, Doha 2713, Qatar

b. Department of Chemical Engineering, College of Engineering, Qatar University, Doha 2713, Qatar

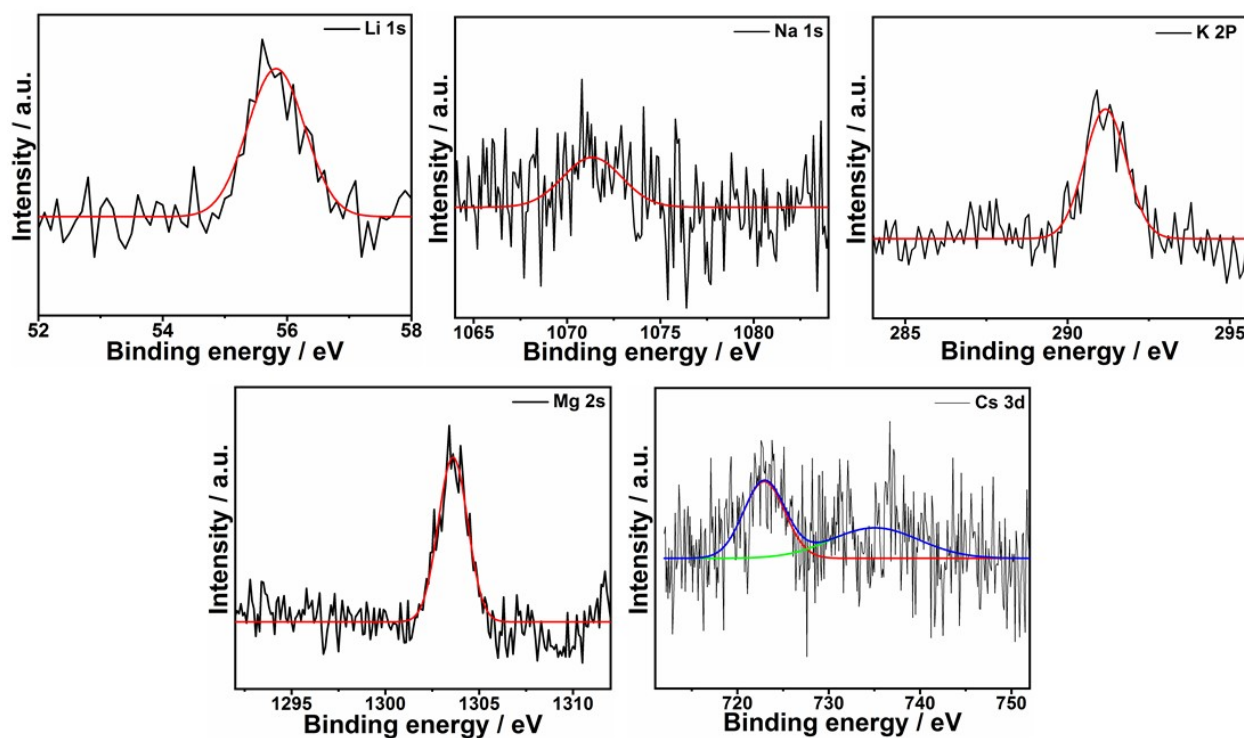

**Figure S1.** High resolution spectra of promoter species.

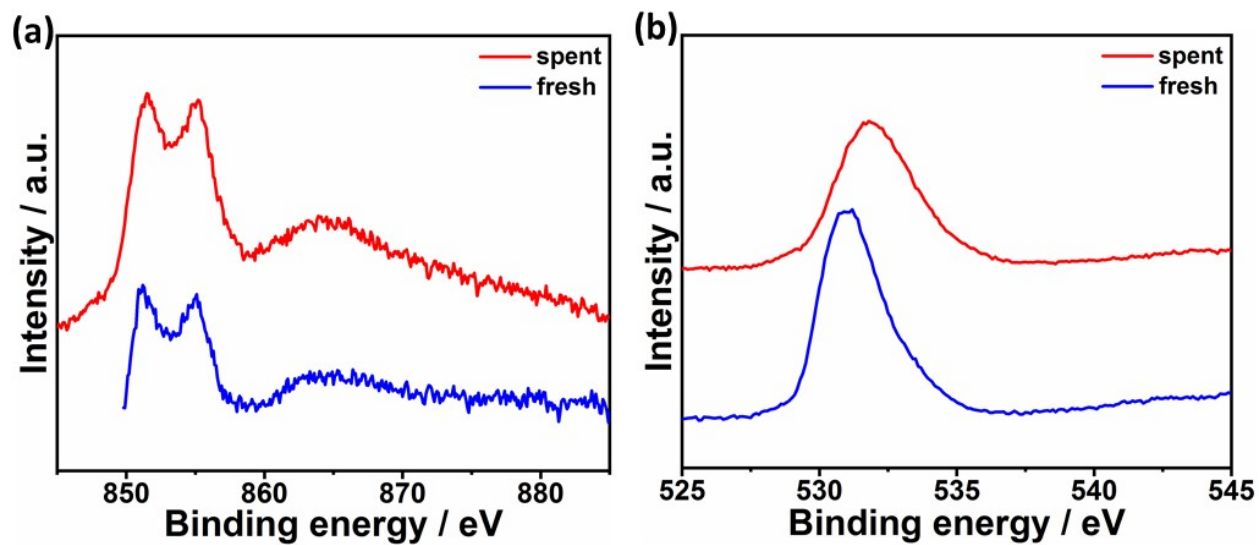

**Figure S2.** High resolution spectra of (a) Ni 2p and (b) O 1s in freshly reduced and spent Mg-Ni-La<sub>2</sub>O<sub>3</sub>.

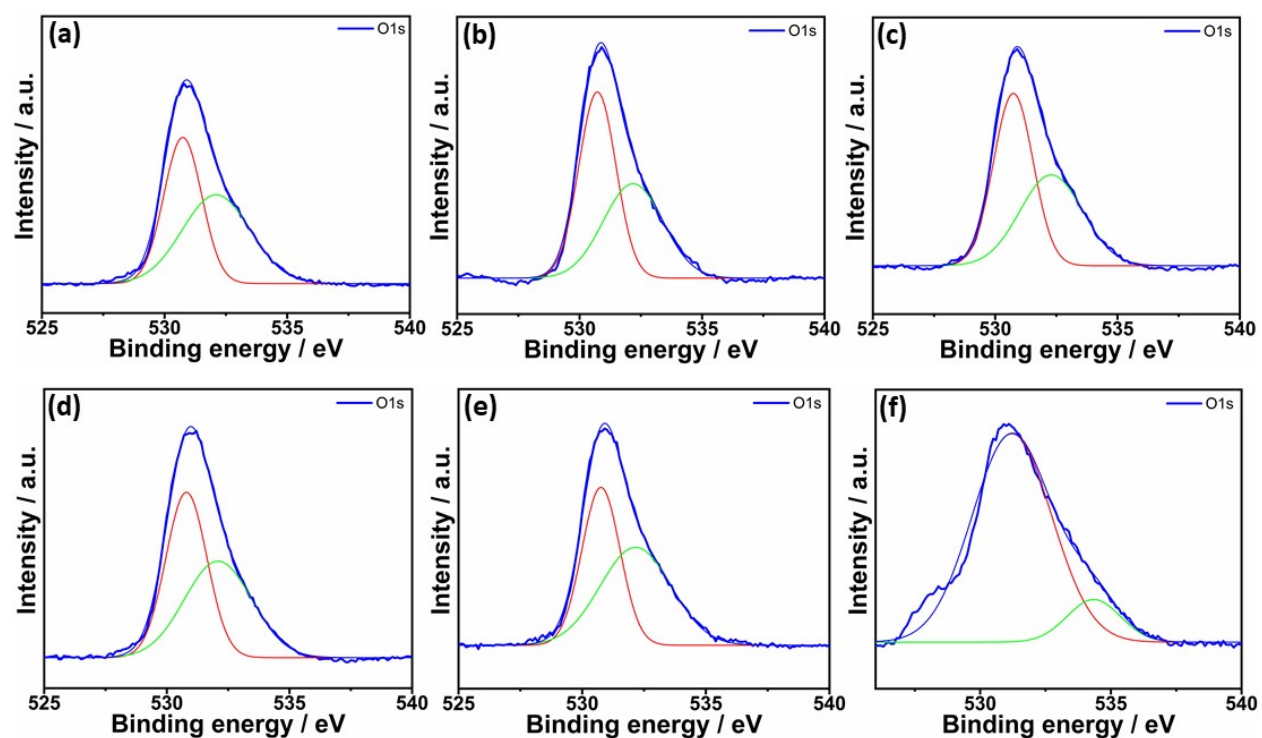

**Figure S3.** Deconvoluted O 1s spectra of reduced (a) Li-Ni-La<sub>2</sub>O<sub>3</sub>, (b) Na-Ni-La<sub>2</sub>O<sub>3</sub>, (c) K-Ni-La<sub>2</sub>O<sub>3</sub>, (d) Mg-Ni-La<sub>2</sub>O<sub>3</sub>, (e) Cs-Ni-La<sub>2</sub>O<sub>3</sub>, and (f) Ni-La<sub>2</sub>O<sub>3</sub>.

**Table S1.** Ratio of adsorbed oxygen species in reduced catalysts

| Catalyst                             | Percentage of adsorbed oxygen (%) |
|--------------------------------------|-----------------------------------|
| Li-Ni-La <sub>2</sub> O <sub>3</sub> | 52.0                              |
| Na-Ni-La <sub>2</sub> O <sub>3</sub> | 44.8                              |
| K-Ni-La <sub>2</sub> O <sub>3</sub>  | 45.0                              |
| Mg-Ni-La <sub>2</sub> O <sub>3</sub> | 48.9                              |
| Cs-Ni-La <sub>2</sub> O <sub>3</sub> | 53.5                              |
| Ni-La <sub>2</sub> O <sub>3</sub>    | 12.0                              |

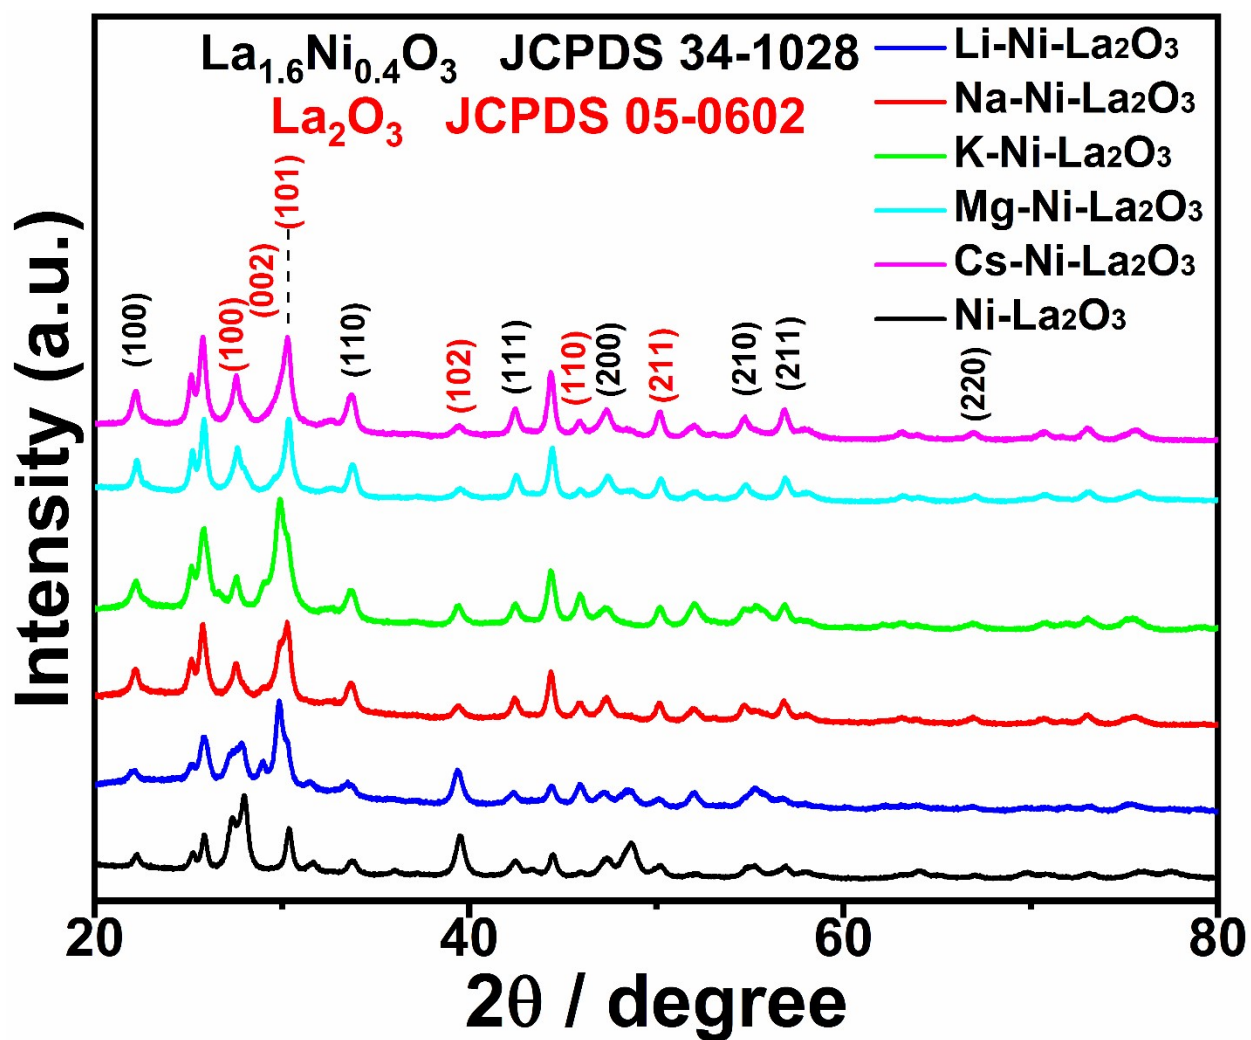

Figure S4. XRD patterns of as-prepared catalysts.
